# Supplementary material for: Exsolution of nanoparticles on A-site-deficient lanthanum ferrite perovskites: its effect on co-electrolysis of CO2 and H2O
Source: Royal Society of Chemistry journal article supplement (doi:10.1039/d1ta07389c), 2021-11-22
Supplement: d1ta07389c1.pdf [file d1ta07389c1.pdf]

## Supplementary Information File

### **Exsolution of Nanoparticles on A-site-deficient ferrite perovskites: Its effect on co-electrolysis of CO<sub>2</sub> and H<sub>2</sub>O**

Jaesung Kim<sup>a</sup>, Matthew Ferree<sup>a</sup>, Seval Gunduz<sup>a</sup>, Jean-Marc M. Millet<sup>b</sup>, Mimoun Aouine<sup>b</sup>, Anne C. Co<sup>c</sup>, and Umit S. Ozkan<sup>\*,a</sup>

<sup>a</sup> William G. Lowrie Department of Chemical and Biomolecular Engineering, The Ohio State University, Columbus, Ohio 43210, United States

<sup>b</sup> Institut de Recherche sur la Catalyse et l'Environnement de Lyon, UMR 5256 Université Claude-Bernard Lyon 1, 69626 Villeurbanne Cedex, France

<sup>c</sup> Department of Chemistry and Biochemistry, The Ohio State University, Columbus, Ohio 43210, United States

\* Corresponding Author: Ozkan.1@osu.edu

Table S1. Indexing parameters for the crystal phase of LaFeO<sub>3</sub> orthorhombic perovskite.

| Reference code: 00-152-6450                 |         |                       |                                                  |                                                           |
|---------------------------------------------|---------|-----------------------|--------------------------------------------------|-----------------------------------------------------------|
| Formula: LaFeO <sub>3</sub>                 |         |                       |                                                  |                                                           |
| Crystallographic parameters                 |         |                       |                                                  |                                                           |
| Crystal system: Orthorhombic                |         |                       |                                                  |                                                           |
| Space group: P b n m                        |         |                       |                                                  |                                                           |
| a = 0.5552 nm, b = 0.5563 nm, c = 0.7843 nm |         |                       |                                                  |                                                           |
| Figure                                      | 2 θ (°) | Lattice Plane (h k l) | d- spacing (nm)<br>experimental /<br>theoretical | Degrees to spot 1<br>(°)<br>experimental /<br>theoretical |
| Figure 1(c1)                                | 32.2195 | (2 0 0)               | 0.2762 / 0.27760                                 | 0                                                         |
| Figure 1(c1)                                | 32.1541 | (0 2 0)               | 0.2772 / 0.27815                                 | 90.4 / 90                                                 |
| Figure 1(c2)                                | 32.2195 | (2 0 0)               | 0.2759 / 0.27760                                 | 0                                                         |
| Figure 1(c2)                                | 46.1605 | (2 2 0)               | 0.1988 / 0.19649                                 | 45.4 / 45                                                 |

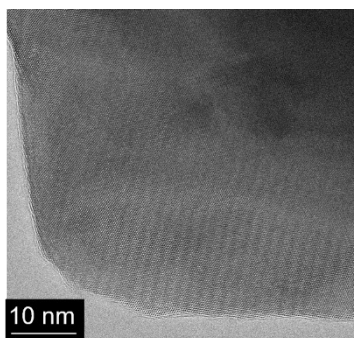

Fig. S1. TEM image of LSNF at 400°C under 1 mbar H<sub>2</sub>.

Table S2. Indexing parameters for the crystal phase of Fe<sub>0.507</sub>Ni<sub>0.493</sub> monoclinic alloy.

| Reference code: 00-901-1506<br>Formula: Fe <sub>0.507</sub> Ni <sub>0.493</sub><br>Crystallographic parameters<br>Crystal system: Monoclinic<br>Space group: P 1 m 1<br>a = 0.35810 nm, b = 0.35820 nm, c = 0.35870 nm |                           |                           |
|------------------------------------------------------------------------------------------------------------------------------------------------------------------------------------------------------------------------|---------------------------|---------------------------|
| Lattice Plane (h k l)                                                                                                                                                                                                  | d- spacing (nm)           | Degrees to spot 1         |
|                                                                                                                                                                                                                        | experimental/ theoretical | experimental/ theoretical |
| (0 0 2)                                                                                                                                                                                                                | 0.17 / 0.17935            | 0.00                      |
| (1 1 1)                                                                                                                                                                                                                | 0.21 / 0.20684            | 54.07 / 54.74             |
| (1 1 -1)                                                                                                                                                                                                               | 0.20 / 0.20693            | 126.85 / 125.26           |

Table S3. Indexing parameters for the crystal phase of La<sub>2</sub>NiO<sub>4</sub> RP phase.

| Database code ICSD 44121<br>Formula: La <sub>2</sub> NiO <sub>4</sub><br>Crystallographic parameters<br>Crystal system: orthorhombic<br>Space group: F m m m<br>a = 0.546520 nm, b = 0.546869 nm, c = 0.1267804 nm |                           |                           |
|--------------------------------------------------------------------------------------------------------------------------------------------------------------------------------------------------------------------|---------------------------|---------------------------|
| Lattice Plane (h k l)                                                                                                                                                                                              | d- spacing (nm)           | Degrees to spot 1         |
|                                                                                                                                                                                                                    | experimental/ theoretical | experimental/ theoretical |
| (2 2 0)                                                                                                                                                                                                            | 0.2033 / 0.1933           | 0.00                      |
| (2 -2 0)                                                                                                                                                                                                           | 0.2065 / 0.1933           | 90.47 / 90.00             |

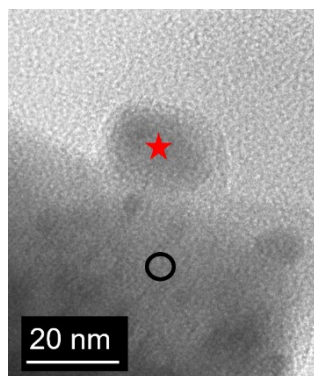

Fig. S2. STEM image of Red-LSNF after 2 h of reduction under 5% H<sub>2</sub>/N<sub>2</sub> at 800°C.

The atomic composition on the point marked with a star: La 7.6%, Sr 0.6%, Ni 45.8%, Fe 46.0%. The atomic composition on the point marked with a circle: La 33.0%, Sr 2.8%, Ni 11.2%, Fe 53.0%.

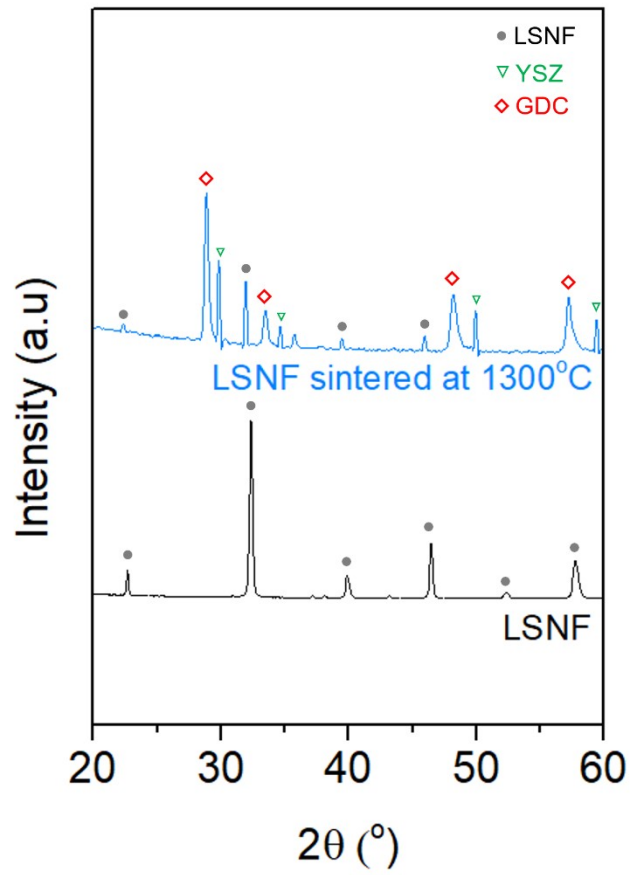

Fig. S3. (a) XRD pattern of LSNF cathode on GDC buffer layer on YSZ electrolyte after 2 h of sintering under air at 1300°C.
